# Supplementary material
Source: PubMed Central journal article supplement (PMC3868407)
Supplement: Supp_Fig1.pdf [file Supp_Fig1.pdf]

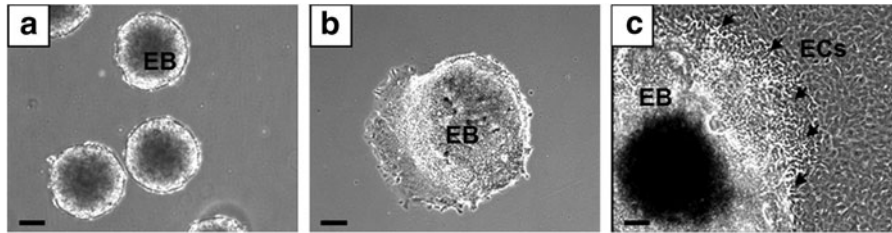

**SUPPLEMENTARY FIG. S1.** EB formation and EB coculture with HMECs. **(a)** EB day 3 in suspension. **(b)** EB day 6 cultured alone attached to a coverslip. **(c)** EB day 15 cocultured with HMECs (cell-cell interphase indicated by *black arrows*). Scale bars = 100  $\mu\text{m}$ . EBs, embryoid bodies; HMECs, human microvascular endothelial cells.
